# Supplementary material for: Collaborative governance for forest fire mitigation in the large-scale palm oil enclaves: Case studies from West Kalimantan, Indonesia
Source: Research Square preprint supplement (doi:10.21203/rs.3.rs-6282160/v1), 2025-03-26
Supplement: Supplementary file 1 [file 8bd4af2c863cf1126a464ae4.docx]

***Appendix 2. The drivers of collaboration in the forest and land fires mitigation in enclaves***

| **Actor** | **Uncertainty** | **Interdependence** | **Consequential Incentives** |
| --- | --- | --- | --- |
| Local Communities | Tension between traditional slash-and-burn practices and the changing biophysical and non-biophysical landscape. | Dependence on the company, which has adequate firefighting equipment. | Assistance with firefighting personnel from the company. |
| Village Office | Demands from the community for slash-and-burn practices and the threat of uncontrolled fires. | Limited funds for conducting fire awareness campaigns and financial support for FFGA. | Rewards from the company for being declared hotspot-free. |
| Palm Oil Company | Concerns about fires being detected as hotspots by satellite imagery and spreading to the company's plantations. | The legitimacy of the village office to conduct fire awareness campaign activities and participate in firefighting with the community. | Human resources of FCC and FFAG, government pressure, and market-based certification. |
| District military and police institutions | Kekhawatiran ketertiban dan api meluas tidak terkendali. | Assistance with equipment, honorarium, and training from the company. | The establishment of community harmony with no social conflicts. |
| District Office | Concerns about communities conducting slash-and-burn practices against Governor Regulation No. 1/2022. | Limited personnel and equipment. | The subdistrict territory is safe from any forest fires potential. |
