# Supplementary material for: Collaborative governance for forest fire mitigation in the large-scale palm oil enclaves: Case studies from West Kalimantan, Indonesia
Source: Research Square preprint supplement (doi:10.21203/rs.3.rs-6282160/v1), 2025-03-26
Supplement: Supplementary file 2 [file bcb22adc1a1889152c81a1d3.docx]

***Appendix 1.* *Approaches of collaboration in the forest and fires mitigation***

| **Activities** | **Collaborative approaches** | | |
| --- | --- | --- | --- |
| **Structural arrangement** | **Knowledge and learning** | **Resource sharing** |
| Fire awarness campaigns | The company and government institutions at the sub-district level are the dominant actors in fire awareness campaign activities. | All collaborating actors have their respective roles in providing information for fire awareness campaigns. | The company allocates substantial resources for signboards, while the village office provides food refreshments during the fire awareness dissemination. |
| Prepardness | The company plays a dominant role in fire preparedness drills and the initiation of MoUs, while the emergency fire response post is primarily initiated by government institutions at the sub-district level. | The process of knowledge and learning occurs in one direction, where the company conducts fire simulation and training with the help of Mangga Agni. | The company covers all expenses for the fire preparedness drill and provides equipment for the emergency post. The company also supplies drones and vehicles for patrol. |
| Fighting against the fires | The village office has become a powerful institution with the legitimacy to approve or reject slash-and-burn proposals. For large-scale fires, BPBD acts as the team leader and decision-maker, representing the district government. | The community receives information about burn timings from the company, and the company’s firefighters learn to interpret wind directions and control fires using firebreaks established from the community. | The company provides firefighting equipment, while the village office, the subdistrict military, and police stations supply personnel. |
